# Supplementary material for: Analyzing economic effect on mRNA vaccine inventory management with redistribution policy
Source: PubMed Central journal article supplement — Sci Rep. 2024 Sep 3;14:20425. doi: 10.1038/s41598-024-71322-5 (PMC11371817; doi:10.1038/s41598-024-71322-5), 2024-09-03
Supplement: 41598_2024_71322_MOESM1_ESM.pdf [file 41598_2024_71322_MOESM1_ESM.pdf]

# Analyzing Economic Effect on mRNA Vaccine Inventory Management with Redistribution Policy

Hyungju Kim, Hyungjoo Cha, Taesu Cheong

## **Supplementary material**

This file includes :

1. Supplementary Table S1
2. Supplementary Table S2

| $(h^+, h^-)$   | (7, 5)       |          |         |       |         |          |         |               |       |
|----------------|--------------|----------|---------|-------|---------|----------|---------|---------------|-------|
| Policies       | DES-NLT      |          |         |       | DES-LT  |          |         |               |       |
| Costs          | Overage      | Underage | Reorder | Total | Overage | Underage | Reorder | Transshipment | Total |
| <b>30 Days</b> | <b>2,055</b> | 21,860   | 39,710  | 485   | 1,365   | 21,920   | 38,940  | 370           | -500  |

Supplementary Table S 1: LT policy being superior than NLT policy due to overage costs.

| $(h^+, h^-)$   | (7, 5)  |          |         |       |         |               |         |               |       |
|----------------|---------|----------|---------|-------|---------|---------------|---------|---------------|-------|
| Policies       | DES-NLT |          |         |       | DES-LT  |               |         |               |       |
| Costs          | Overage | Underage | Reorder | Total | Overage | Underage      | Reorder | Transshipment | Total |
| <b>30 Days</b> | 1,605   | 21,620   | 39,820  | 55    | 1,665   | <b>22,480</b> | 38,940  | 320           | 1,345 |

Supplementary Table S 2: NLT policy being superior than LT policy due to underage costs.

In Supplementary Table S 1, the total cost of the NLT policy was lower than that of the LT policy. This outcome is attributed to the LT policy generating higher underage costs, suggesting that demand exceeded the hospital's capacity. In contrast, in the Supplementary Table S 2 where the LT policy demonstrated superiority, the NLT policy resulted in higher overage costs, indicating a surplus of doses due to lower-than-expected demand. Additionally, while transshipment costs increased in this scenario compared to Supplementary Table S 1, they also generated more profit, underscoring the effectiveness of the LT policy in these circumstances.
